# Supplementary material for: Self-assembled nanoaggregates based on polyaspartamide graft copolymers for pH-controlled release of doxorubicin
Source: Royal Society of Chemistry journal article supplement (doi:10.1039/c4tb01930j), 2015-01-01
Supplement: c4tb01930j1.pdf [file c4tb01930j1.pdf]

## Supporting Information

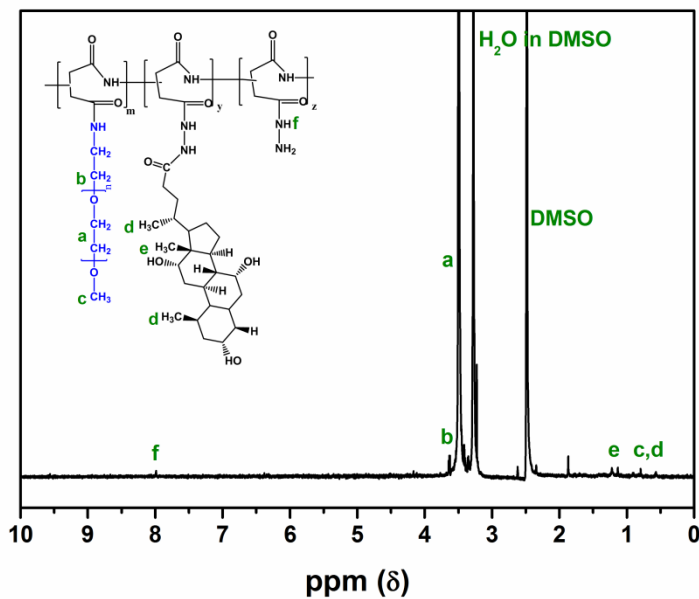

Figure S1. <sup>1</sup>H-NMR spectra of MPEG/CA10/Hyd-g-PASPAM .

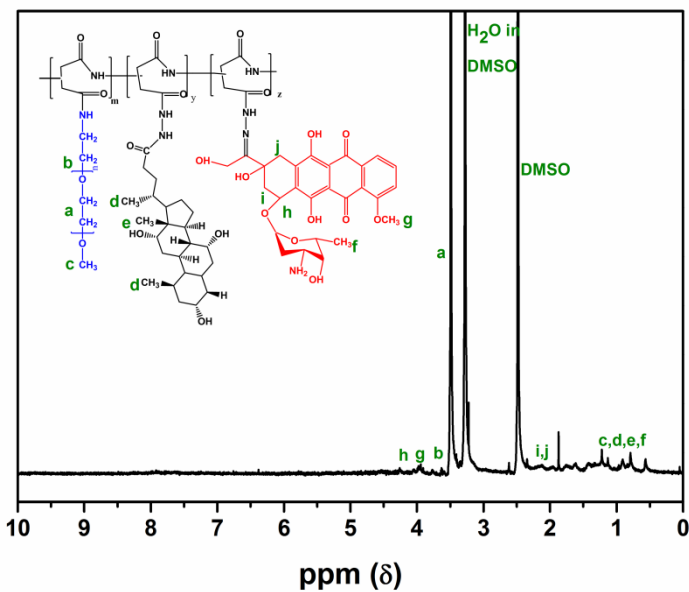

Figure S2. <sup>1</sup>H-NMR spectra of MPEG/CA10/DOX-g-PASPAM.
